# Supplementary material for: Methylation changes induced by a glycodendropeptide immunotherapy and associated to tolerance in mice
Source: Front Immunol. 2022 Dec 14;13:1094172. doi: 10.3389/fimmu.2022.1094172 (PMC9832389; doi:10.3389/fimmu.2022.1094172)
Supplement: Supplementary file 4 [file Table_3.xlsx]

## Sheet: Desensitized.5nM
Seqnames	Start	End	nCyt	qvalue	Rnaseq_padj	Meth.diff	Rnaseq_logFC	GeneId	GeneSymbol
1	58460001	58461200	13	0.0310135122949866	0.0012630836533032	5.04110044466609	1.1057492742771	ENSMUSG00000026034	Clk1
10	11023801	11024800	12	0.0410654176572055	7.99914425384279e-05	7.06734931801616	1.10426752003206	ENSMUSG00000090112	Shprh
10	69186201	69187400	14	0.0172920582358182	0.000203215217703494	6.06047253145927	-1.36707332716638	ENSMUSG00000019942	Cdk1
10	69189501	69190700	16	0.0260408574638088	0.000203215217703494	-9.55183879522254	-1.36707332716638	ENSMUSG00000019942	Cdk1
11	3113901	3114900	37	0.0389112861403239	0.000267779671005368	6.85571738203317	1.28268188369518	ENSMUSG00000023764	Sfi1
11	44288001	44289500	13	0.0133637695859786	3.55476949561135e-05	6.4622286580085	-1.26825660613905	ENSMUSG00000004296	Il12b
11	44290101	44291500	11	0.000375287409862332	3.55476949561135e-05	7.05252631294771	-1.26825660613905	ENSMUSG00000004296	Il12b
11	116963001	116964100	26	0.00106326455374218	6.2694026435129e-06	5.56879103506167	1.24623427713838	ENSMUSG00000086859	Snhg20
11	119988301	119989300	11	0.016367095778309	0.00210073117662925	5.99064686540842	1.07371935012466	ENSMUSG00000025377	Tepsin
12	35582501	35584200	18	0.0163049630791183	4.79412832220489e-06	7.30516721807137	-1.51959572982049	ENSMUSG00000019256	Ahr
15	89034201	89035500	14	0.0170117564745675	3.56316010610091e-21	5.66583712829804	1.12494806983768	ENSMUSG00000053137	Mapk11
15	89312301	89313600	40	0.00249049517250681	2.91353076492539e-06	5.64379069195989	1.14810268802395	ENSMUSG00000022617	Chkb
16	10793201	10794400	23	0.000212108078337742	4.64344819605188e-10	7.23116663655384	-1.33938957387914	ENSMUSG00000022500	Litaf
16	10809101	10810200	13	0.0320491309330449	4.64344819605188e-10	5.96835750053657	-1.33938957387914	ENSMUSG00000022500	Litaf
16	10810801	10811900	15	0.0061844095931544	4.64344819605188e-10	6.85371113539744	-1.33938957387914	ENSMUSG00000022500	Litaf
16	45831401	45832600	21	0.0204283267677053	6.67163667015357e-05	-7.21669598487546	-1.18322448883974	ENSMUSG00000087141	Plcxd2
17	35417001	35418200	39	0.0150737746577492	0.000424580782163489	8.68526159029037	1.3768855127774	ENSMUSG00000024401	Tnf
17	35420801	35422100	47	0.0355984349206984	0.000424580782163489	-8.78945702690486	1.3768855127774	ENSMUSG00000024401	Tnf
17	37357201	37358400	14	0.0264347186405109	5.36875286355904e-06	-6.37577922685813	1.19937219521545	ENSMUSG00000024462	Gabbr1
18	21078601	21080700	25	0.00599812745217705	2.96237561467854e-10	-8.44996278446998	-2.30233875715521	ENSMUSG00000033107	Rnf125
19	4266901	4267900	16	0.0286766333226858	2.40892546434626e-08	8.48994857410005	1.38979526600273	ENSMUSG00000040663	Clcf1
2	3713501	3714600	19	0.000181736458529902	1.08840794427566e-11	6.02117029305946	-1.31290797406745	ENSMUSG00000026655	Fam107b
2	30360801	30361800	27	0.0318673004195568	9.35730877422536e-05	5.3171262126486	-1.77454555084464	ENSMUSG00000089762	Ier5l
2	167530101	167531100	11	0.0109718175028792	4.856901707075e-05	5.91938499557427	-1.20436503260308	ENSMUSG00000056501	Cebpb
3	88399901	88401000	10	0.0390334632149638	0.000962559080997286	6.51983612118859	-1.03785387385942	ENSMUSG00000028063	Lmna
4	48041901	48043000	27	0.00016142524269845	1.16307462433627e-09	6.38917902880333	-1.56784385469296	ENSMUSG00000028341	Nr4a3
4	48050701	48051800	27	0.00664083557060178	1.16307462433627e-09	5.71991093381159	-1.56784385469296	ENSMUSG00000028341	Nr4a3
4	118294801	118296300	12	0.00138580683455641	4.31535296224688e-05	7.15354659344588	-1.15415224419211	ENSMUSG00000006398	Cdc20
4	126446801	126447900	32	0.0183058609664144	2.79611070295935e-06	7.05122205627944	-1.55469830355481	ENSMUSG00000042489	Clspn
5	32295901	32297100	11	0.0164082951479876	6.79847920957602e-08	6.6734775952614	-1.73082623606836	ENSMUSG00000029135	Fosl2
5	64123001	64125600	11	0.00988946148026488	3.95576249672433e-06	8.95391869189538	-1.08637707983272	ENSMUSG00000047881	Rell1
5	110257101	110258100	17	0.0329796966767374	0.00093724366684476	6.26143545460234	1.04288196255636	ENSMUSG00000023284	Zfp605
5	124167501	124168900	15	0.00735513888372903	1.30027028049777e-19	5.7626698233467	-1.75572357654501	ENSMUSG00000066278	Vps37b
5	149202801	149204000	10	0.0461000505717075	0.000159349348546988	5.5062653160527	-1.06877857005716	ENSMUSG00000060063	Alox5ap
6	127429601	127430700	15	4.42799586472962e-05	2.17891611667009e-05	5.65391709197864	1.16171329637627	ENSMUSG00000037997	Parp11
6	127447801	127449000	14	0.0224657858028652	2.17891611667009e-05	-5.44276963527035	1.16171329637627	ENSMUSG00000037997	Parp11
6	127450501	127452100	36	0.0253066042436136	2.17891611667009e-05	-7.92353707141018	1.16171329637627	ENSMUSG00000037997	Parp11
6	127454001	127455000	19	0.0355439420184021	2.17891611667009e-05	-5.12453770411392	1.16171329637627	ENSMUSG00000037997	Parp11
6	129655901	129657000	16	3.8866722487528e-05	0.000179001827523366	-24.2424242424242	-1.33414322841938	ENSMUSG00000030167	Klrc1
7	24158401	24159900	43	0.0082673601588834	2.39746770907816e-06	6.65774266036993	-1.82151186981726	ENSMUSG00000046223	Plaur
7	24163701	24164700	12	0.0215373816082781	2.39746770907816e-06	5.49332617881817	-1.82151186981726	ENSMUSG00000046223	Plaur
7	24457301	24458300	20	0.0273397662916574	2.11338524769062e-06	6.26848812171273	-3.21502025561012	ENSMUSG00000052212	Cd177
7	28539501	28542800	15	0.00230455073109472	1.52259832898242e-06	7.68696192581034	1.51403315385649	ENSMUSG00000053964	Lgals4
7	140596401	140597500	24	0.0258843797293052	1.48394438593414e-05	7.27652669981699	-2.59375266048635	ENSMUSG00000059108	Ifitm6
8	3796201	3797400	10	0.0116766693435365	2.71727403192825e-05	5.35353535353535	-1.13187817485239	ENSMUSG00000031494	Cd209a
8	95114301	95116200	31	0.0140109482767891	3.85143047631305e-09	7.03852880615463	-1.04222037108644	ENSMUSG00000031770	Herpud1
8	106072301	106073300	18	0.00456701302690848	8.62508515635886e-10	5.44249611951881	1.05599557327294	ENSMUSG00000014778	Fhod1
9	64187501	64189100	15	0.00316629008378041	4.63065408388281e-06	8.90303989334698	-1.05957196124168	ENSMUSG00000032397	Tipin
X	100686101	100687600	11	0.0263515615059415	0.00034528664476623	-6.99164017792388	1.56040701500899	ENSMUSG00000034160	Ogt

## Sheet: Tolerant.2nM
Seqnames	Start	End	nCyt	qvalue	Rnaseq_padj	Meth.diff	Rnaseq_logFC	GeneId	GeneSymbol
1	34274701	34276000	20	6.72697438161431e-06	0.000560439098912072	-6.2816355692251	1.37438857763492	ENSMUSG00000026131	Dst
1	40503801	40504800	19	0.00537432124676585	0.000286178149126563	7.85908982716391	1.15788443987394	ENSMUSG00000026070	Il18r1
1	69721901	69723200	24	0.0265616141340008	0.000296654945007213	5.50813853644743	1.90950686023174	ENSMUSG00000025997	Ikzf2
1	86230001	86231200	26	0.00461862249987433	1.68344676698158e-18	5.83365259839564	-2.7871760544933	ENSMUSG00000079445	B3gnt7
10	11025701	11026700	14	0.00724023557334698	0.000183383614784727	6.01000787567952	1.14117186157857	ENSMUSG00000090112	Shprh
11	23446201	23447300	17	0.0292615624098932	5.3255699324538e-07	-5.64766552416773	1.72289061209212	ENSMUSG00000020288	Ahsa2
11	44289001	44290400	30	0.0032403953696462	4.74620626931505e-07	5.84398477188582	-1.72871463658571	ENSMUSG00000004296	Il12b
11	68991101	68992300	16	0.0188923077939172	8.89552062900088e-11	5.15555888489863	-1.85161918151593	ENSMUSG00000020893	Per1
12	40269601	40271100	20	0.0267453567860712	1.99435584742258e-06	8.61976152275596	-1.14750483594497	ENSMUSG00000001627	Ifrd1
12	84267201	84268800	11	0.0206535701916538	1.57574159531625e-06	-5.6301754448464	-1.07879993272693	ENSMUSG00000042507	Mideas
12	85646501	85647600	13	0.0365958927444869	0.000125481006190552	5.41955680892865	-1.51137109558848	ENSMUSG00000034271	Jdp2
12	112821901	112823600	31	0.0208805670827241	4.10031788691742e-12	-7.60726923966114	-1.29233283358579	ENSMUSG00000021298	Gpr132
12	114141801	114142900	10	0.0106358465284229	0.000341033113731294	-8.45326320822376	-3.00289428989079	ENSMUSG00000076666	Ighv14-4
15	76083901	76084900	23	0.0359258895979446	9.04386685844575e-08	9.25578012787491	1.16576879546452	ENSMUSG00000022565	Plec
15	76759801	76761700	20	0.00948473957087462	9.40069386167592e-07	-6.34469964117978	1.19056626762627	ENSMUSG00000033669	Zfp7
16	10793101	10794100	21	0.00768145084329325	3.13661365159744e-06	5.35548374692212	-1.06556348964491	ENSMUSG00000022500	Litaf
17	32071901	32073800	16	0.00465962891367234	1.52680748801669e-08	6.17610639207459	-2.21438571825325	ENSMUSG00000024042	Sik1
17	32074901	32076200	24	5.02545095669568e-05	1.52680748801669e-08	6.99738674752251	-2.21438571825325	ENSMUSG00000024042	Sik1
18	32692601	32693800	19	0.00290494052345278	3.27661380244975e-06	6.30743289251326	-1.25996490031929	ENSMUSG00000090523	Gypc
19	44394201	44395400	17	0.0218090404473506	2.32250893140811e-10	-5.46140991613569	-1.25319825467615	ENSMUSG00000037071	Scd1
2	3713501	3714500	74	0.000493699408888387	1.55358692018119e-12	7.90706608649011	-1.42162889024787	ENSMUSG00000026655	Fam107b
2	57013901	57015300	10	0.006876329952083	0.000884169539807202	5.68936027189094	-1.13783159261757	ENSMUSG00000026826	Nr4a2
2	58084101	58085600	20	0.0119700804884213	2.29168900648446e-14	-6.60068833424076	-1.21227945325065	ENSMUSG00000026832	Cytip
2	92290401	92291900	13	0.00518028520367206	1.461009136204e-06	6.71815843737789	1.19398944294526	ENSMUSG00000049922	Slc35c1
3	9313601	9314800	12	0.00349790648609585	1.47028093556113e-06	-8.10969870287689	-1.41746521050717	ENSMUSG00000069114	Zbtb10
4	48041901	48043000	20	0.000183199607021499	1.25408924644322e-08	6.63842395223171	-1.5259230198025	ENSMUSG00000028341	Nr4a3
4	108156701	108157800	14	0.025769713703581	3.42982837363984e-06	5.9374093857268	-1.09274887684091	ENSMUSG00000034636	Zyg11b
5	124167801	124168800	28	0.03027841474728	5.2726160015472e-20	5.29068073452961	-1.94039413248827	ENSMUSG00000066278	Vps37b
7	92468201	92470000	11	0.000314862539251314	1.16484440261741e-15	8.06762884153076	-1.70427804650515	ENSMUSG00000030643	Rab30
8	116437301	116438400	19	0.0186117155703828	0.000610494909042759	5.00046961256226	1.05724655269802	ENSMUSG00000055435	Maf
